# Supplementary material for: Integrative Descriptions of Two New Mesobiotus Species (Tardigrada, Eutardigrada, Macrobiotidae) from Vietnam
Source: MDPI journal article supplement (doi:10.3390/d13110605), 2021-11-21
Supplement: s1 [file s1]

## Best partitioning scheme

Scheme Name : start\_scheme

Scheme lnL : -19032.0689697

Scheme AIC : 38300.1379395

Number of params : 118

Number of sites : 3039

Number of subsets : 6

| Subset | Best Model | # sites | subset id                        | Partition names |
|--------|------------|---------|----------------------------------|-----------------|
| 1      | GTR+I+G    | 1016    | 35fae3d51a3b133404df394c6e7584a5 | 18S             |
| 2      | GTR+I+G    | 811     | 12e32465f1e4365cef4504641f4e74c9 | 28S             |
| 3      | GTR+I+G    | 220     | faa417ad6fa49816876f428359bc3c53 | COI_pos2        |
| 4      | GTR+I+G    | 219     | 12667fe9bdd0f13387dbf1f2f6da5ab1 | COI_pos3        |
| 5      | GTR+I+G    | 219     | f41cff27bc16ea3310eb4913a5004d6d | COI_pos1        |
| 6      | SYM+G      | 554     | 15cbdcda0e6e05f82f8180744220b4a6 | ITS2            |
